# Supplementary material
Source: PubMed Central journal article supplement (PMC4628228)
Supplement: Supp_Table1.pdf [file Supp_Table1.pdf]

## Supplementary Data

**Supplementary Table 1. Additional Sample Characteristics and Mean Weighted Screen Time for Characteristics**

|                                                    | Percent of sample with characteristic (n) (n = 302) | Mean (SD) weighted screen time, hours | Mann-Whitney's or Kruskal-Wallis' p value for group |
|----------------------------------------------------|-----------------------------------------------------|---------------------------------------|-----------------------------------------------------|
| AAP recommendations                                | —                                                   | —                                     | —                                                   |
| Screen time                                        | —                                                   | —                                     | —                                                   |
| Meets recommendation for age                       | 53% (151)                                           | 0.8 (0.7)                             | <b>&lt;0.001</b>                                    |
| Does not meet recommendation for age               | 47% (135)                                           | 2.6 (1.7)                             |                                                     |
| TV in bedroom                                      | —                                                   | —                                     | —                                                   |
| No TV in bedroom                                   | 56% (163)                                           | 1.5 (1.3)                             | 0.27                                                |
| Yes TV in bedroom                                  | 44% (126)                                           | 1.8 (1.8)                             |                                                     |
| Meets both recommendations                         | —                                                   | —                                     | —                                                   |
| Yes                                                | 29% (79)                                            | 0.8 (0.7)                             | <b>&lt;0.001</b>                                    |
| No                                                 | 71% (195)                                           | 2.0 (1.7)                             |                                                     |
| Parent attitudes                                   | —                                                   | —                                     | —                                                   |
| TV is of value                                     | —                                                   | —                                     | —                                                   |
| Disagree                                           | 34% (95)                                            | 1.2 (1.4)                             | <b>&lt;0.001</b>                                    |
| Do not disagree                                    | 66% (182)                                           | 1.9 (1.6)                             |                                                     |
| TV is useful                                       | —                                                   | —                                     | —                                                   |
| Disagree                                           | 42% (119)                                           | 1.5 (1.5)                             | 0.09                                                |
| Do not disagree                                    | 58% (164)                                           | 1.7 (1.5)                             |                                                     |
| I restrict TV                                      | —                                                   | —                                     | —                                                   |
| Agree                                              | 70% (192)                                           | 1.5 (1.4)                             | 0.10                                                |
| Do not agree                                       | 30% (84)                                            | 1.9 (1.9)                             |                                                     |
| I have to be sure my child does not watch too much | —                                                   | —                                     | —                                                   |
| Agree                                              | 72% (207)                                           | 1.5 (1.4)                             | 0.27                                                |
| Do not agree                                       | 28% (79)                                            | 1.8 (1.8)                             |                                                     |
| I will switch off TV if too much                   | —                                                   | —                                     | —                                                   |
| Agree                                              | 81% (231)                                           | 1.6 (1.4)                             | 0.99                                                |
| Do not agree                                       | 19% (56)                                            | 1.78 (2.0)                            |                                                     |

AAP, American Academy of Pediatrics; TV, television.  
 Bolded values are statistically significant with  $p < 0.05$ .
